# Supplementary material for: Border-fence falls versus domestic falls at a South Texas trauma center
Source: HighWire-hosted journal article supplement (doi:10.1136/tsaco-2022-001020), 2023-02-01
Supplement: tsaco-2022-001020supp001_data_supplement.pdf [file tsaco-2022-001020supp001_data_supplement.pdf]

Supplemental Table 1. Differences Between Border-Fence Falls and Domestic Falls by Injury

| Characteristics, n (%)             | Border,<br>N=64 (52%) | Domestic,<br>N=60 (48%) | P-value      |
|------------------------------------|-----------------------|-------------------------|--------------|
| <b>Head</b>                        | 2 (3%)                | 15 (25%)                | <b>0.004</b> |
| <i>Intracranial hemorrhage</i>     | 2 (3%)                | 13 (22%)                | <b>0.002</b> |
| <i>Subdural hemorrhage</i>         | 1 (2%)                | 9 (15%)                 | <b>0.007</b> |
| <i>Subarachnoid hemorrhage</i>     | 1 (2%)                | 10 (17%)                | <b>0.003</b> |
| <i>Intraparenchymal hemorrhage</i> | 1 (2%)                | 1 (2%)                  | >0.99        |
| <i>Soft tissue injury</i>          | 0 (0%)                | 6 (10%)                 | <b>0.01</b>  |
| <b>Face</b>                        | 1 (2%)                | 7 (12%)                 | <b>0.03</b>  |
| <i>Maxillary fracture</i>          | 0 (0%)                | 1 (2%)                  | 0.48         |
| <i>Mandibular fracture</i>         | 1 (2%)                | 0 (0%)                  | >0.99        |
| <i>Zygomatic fracture</i>          | 0 (0%)                | 3 (5%)                  | 0.11         |
| <i>Nasal bone fracture</i>         | 0 (0%)                | 3 (5%)                  | 0.11         |
| <i>Orbital fracture</i>            | 0 (0%)                | 4 (7%)                  | 0.05         |
| <i>Contusion</i>                   | 0 (0%)                | 3 (5%)                  | 0.11         |
| <i>Eye injury</i>                  | 0 (0%)                | 1 (2%)                  | 0.48         |
| <b>Chest</b>                       | 3 (5%)                | 16 (27%)                | <b>0.007</b> |
| <i>Rib fracture</i>                | 2 (3%)                | 13 (22%)                | <b>0.002</b> |
| <i>Lung contusion</i>              | 1 (2%)                | 9 (15%)                 | <b>0.007</b> |
| <i>Pneumothorax</i>                | 2 (3%)                | 7 (12%)                 | 0.09         |
| <i>Hemothorax</i>                  | 0 (0%)                | 4 (7%)                  | 0.05         |
| <i>Clavicular fracture</i>         | 1 (2%)                | 3 (5%)                  | 0.35         |
| <i>Scapular fracture</i>           | 0 (0%)                | 3 (5%)                  | 0.11         |
| <b>Abdomen</b>                     | 0 (0%)                | 4 (7%)                  | 0.05         |
| <i>Kidney laceration</i>           | 0 (0%)                | 2 (3%)                  | 0.23         |
| <i>Splenic laceration</i>          | 0 (0%)                | 1 (2%)                  | 0.48         |
| <i>Liver laceration</i>            | 0 (0%)                | 2 (3%)                  | 0.23         |
| <b>Spine</b>                       | 23 (36%)              | 21 (35%)                | 0.91         |
| <i>Cervical fracture</i>           | 0 (0%)                | 4 (7%)                  | 0.05         |
| <i>Lumbar fracture</i>             | 18 (28%)              | 17 (28%)                | 0.98         |
| <i>Thoracic fracture</i>           | 9 (14%)               | 8 (13%)                 | 0.90         |
| <b>Pelvis</b>                      | 4 (6%)                | 6 (10%)                 | 0.52         |
| <i>Ilium fracture</i>              | 1 (2%)                | 3 (5%)                  | 0.35         |
| <i>Rami fracture</i>               | 4 (6%)                | 5 (8%)                  | 0.74         |
| <i>Sacral fracture</i>             | 4 (6%)                | 2 (3%)                  | 0.68         |
| <i>Acetabular fracture</i>         | 1 (2%)                | 4 (7%)                  | 0.20         |
| <b>Extremities</b>                 | 47 (73%)              | 25 (42%)                | <b>0.003</b> |
| <i>Ankle fracture</i>              | 12 (19%)              | 6 (10%)                 | 0.17         |
| <i>Foot fracture</i>               | 2 (3%)                | 2 (3%)                  | >0.99        |
| <i>Fibular fracture</i>            | 22 (34%)              | 7 (12%)                 | <b>0.003</b> |

---

|                             |          |         |              |
|-----------------------------|----------|---------|--------------|
| <i>Hand avulsion</i>        | 2 (3%)   | 2 (3%)  | >0.99        |
| <i>Calcaneus fracture</i>   | 14 (22%) | 6 (10%) | 0.07         |
| <i>Tibial fracture</i>      | 24 (38%) | 9 (15%) | <b>0.005</b> |
| <i>Humeral fracture</i>     | 1 (2%)   | 4 (7%)  | 0.20         |
| <i>Ulnar fracture</i>       | 0 (0%)   | 5 (8%)  | <b>0.02</b>  |
| <i>Radial fracture</i>      | 4 (6%)   | 9 (15%) | 0.11         |
| <i>Femur fracture</i>       | 1 (2%)   | 3 (5%)  | 0.35         |
| <i>Elbow dislocation</i>    | 1 (2%)   | 1 (2%)  | >0.99        |
| <i>Shoulder dislocation</i> | 0 (0%)   | 1 (2%)  | 0.48         |
| <i>Knee contusion</i>       | 1 (2%)   | 0 (0%)  | >0.99        |

---
